# Supplementary material
Source: Springer Nature journal article supplement (https://www.springermedizin.de/resource/supplementary/12970_2007_40_MOESM2_ESM.pdf/9594286)

Serum choline (nm/mL)

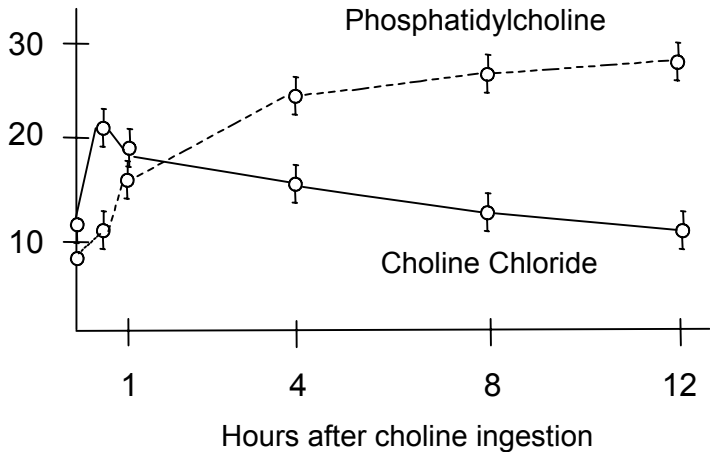

Supplement: MOESM2 [file 9594286]
